# Supplementary material for: Mapping of quantitative trait loci for phytic acid and phosphorus contents in seed and seedling of mungbean (Vigna radiata (L.) Wilczek)
Source: PubMed Central journal article supplement — Breed Sci. 2012 Mar 20;62(1):87–92. doi: 10.1270/jsbbs.62.87 (PMC3405952; doi:10.1270/jsbbs.62.87), 2012-03-20
Supplement: 62_87Nsuppl1.pdf [file 62_87Nsuppl1.pdf]

**Supplemental Table 1.** Means and ranges for total P, phytic acid P, and inorganic P in seed and seedling; 100-seed weight, days to 50% flowering and days to 50% maturity in the parents and F<sub>2:3</sub> population of the cross V1725BG × AusTRCF321925

| Trait                                        | Mean±SD   |               |                             | Population range<br>(% of population<br>mean) |
|----------------------------------------------|-----------|---------------|-----------------------------|-----------------------------------------------|
|                                              | V1725BG   | AusTRCF321925 | F <sub>2:3</sub> Population |                                               |
| Seed phytic acid P (mg g <sup>-1</sup> )     | 3.64±0.08 | 2.47±0.28     | 3.11±0.28                   | 2.33 - 3.99 (75 - 128)                        |
| Seed inorganic P (mg g <sup>-1</sup> )       | 0.37±0.05 | 0.63±0.07     | 0.45±0.07                   | 0.32 - 0.76 (71 - 169)                        |
| Seed total P (mg g <sup>-1</sup> )           | 5.99±0.09 | 4.49±0.46     | 5.10±0.47                   | 3.72 - 6.53 (73 - 128)                        |
| Seedling phytic acid P (mg g <sup>-1</sup> ) | 2.95±0.01 | 2.12±0.00     | 2.53±0.33                   | 1.48 - 3.44 (58 - 136)                        |
| Seedling inorganic P (mg g <sup>-1</sup> )   | 1.26±0.15 | 2.85±0.00     | 1.72±0.56                   | 0.71 - 2.99 (41 - 174)                        |
| Seedling total P (mg g <sup>-1</sup> )       | 7.81±0.06 | 4.51±0.00     | 6.05±1.00                   | 4.00 - 11.11 (66 - 184)                       |
| 100-seed weight (g)                          | 4.92±0.09 | 1.14±0.17     | 2.72±0.56                   | 1.61 - 5.40 (59 - 198)                        |
| 50% flowering (days)                         | 34.0±0.00 | 44.0±0.00     | 35.38±4.58                  | 28.0 - 57.0 (79 - 161)                        |
| 50% maturity (days)                          | 46.0±0.00 | 66.0±0.00     | 50.90±4.89                  | 45.0 - 69.0 (88 - 135)                        |
