# Supplementary material for: Mapping of quantitative trait loci for phytic acid and phosphorus contents in seed and seedling of mungbean (Vigna radiata (L.) Wilczek)
Source: PubMed Central journal article supplement — Breed Sci. 2012 Mar 20;62(1):87–92. doi: 10.1270/jsbbs.62.87 (PMC3405952; doi:10.1270/jsbbs.62.87), 2012-03-20
Supplement: 62_87Nsuppl2.pdf [file 62_87Nsuppl2.pdf]

**Supplemental Table 2.** Amplification and polymorphism of SSR markers on the mapping parents, V1725BG and AusTRCF321925

| SSR marker sources | Number of SSR markers |                           |                              |
|--------------------|-----------------------|---------------------------|------------------------------|
|                    | screened              | amplified (% of screened) | polymorphic (% of amplified) |
| Mungbean           | 546                   | 437 (80.04)               | 44 (10.07)                   |
| Azuki bean         | 142                   | 112 (78.87)               | 31 (27.68)                   |
| Cowpea             | 189                   | 154 (81.48)               | 17 (11.04)                   |
| Common bean        | 114                   | 60 (52.63)                | 9 (15.00)                    |
| Total              | 991                   | 763 (76.99)               | 101 (13.24)                  |
